# Supplementary material for: Iguratimod Ameliorates the Severity of Secondary Progressive Multiple Sclerosis in Model Mice by Directly Inhibiting IL-6 Production and Th17 Cell Migration via Mitigation of Glial Inflammation
Source: Preprints.org preprint supplement (doi:10.20944/preprints202306.0987.v1), 2023-06-14
Supplement: Supplementary file 1 [file supplementary]

Figure S1

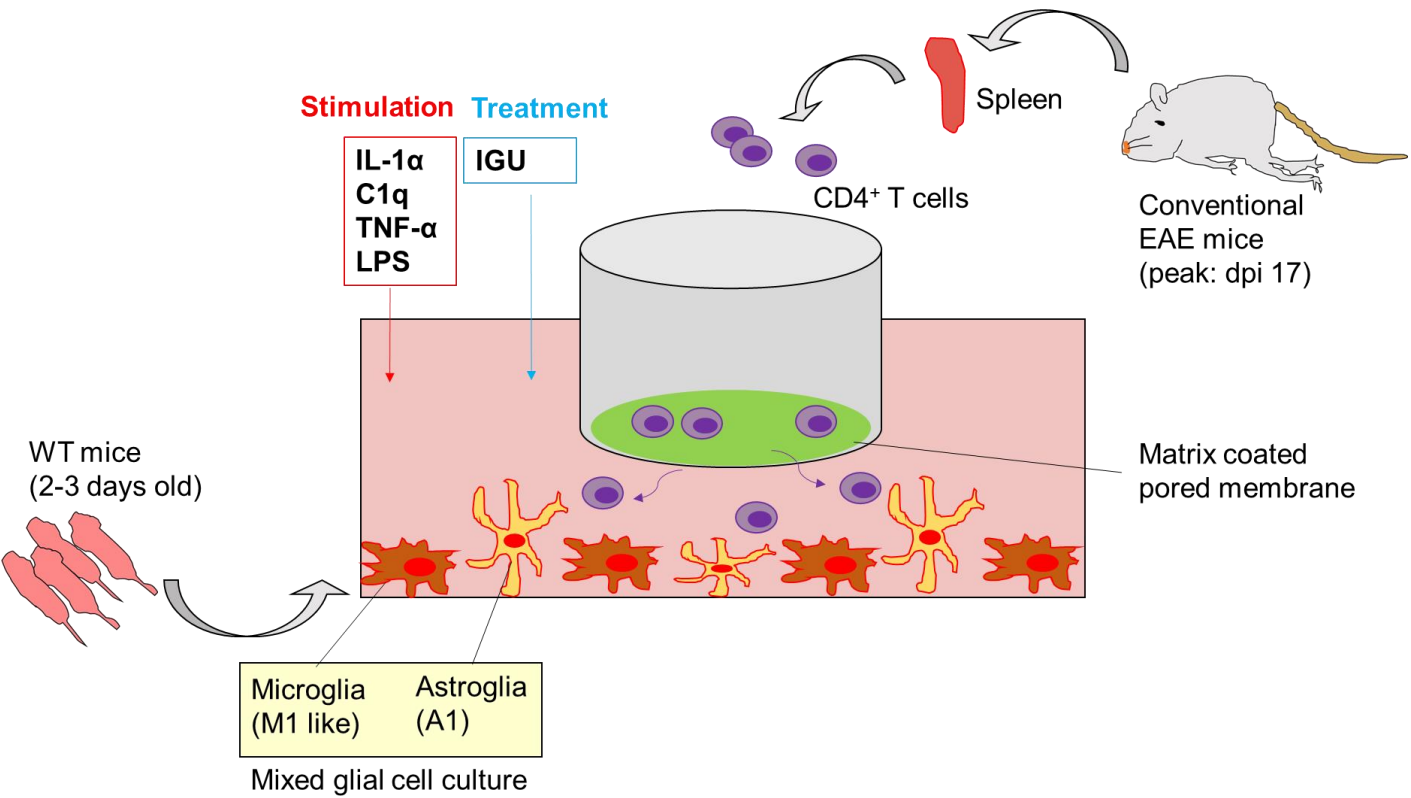

**Figure S2**

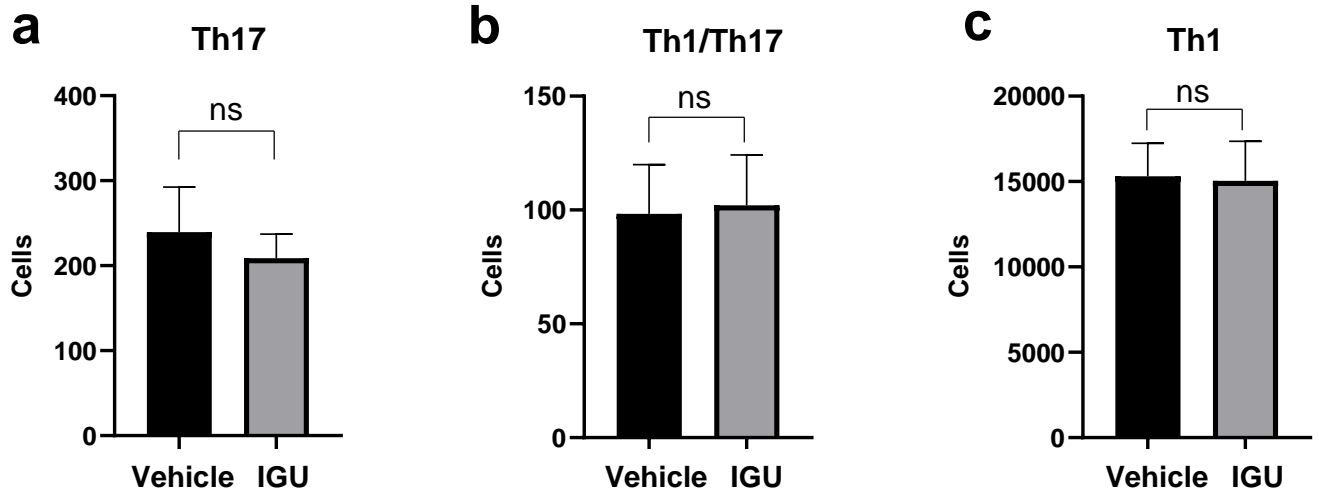

**Figure S3**

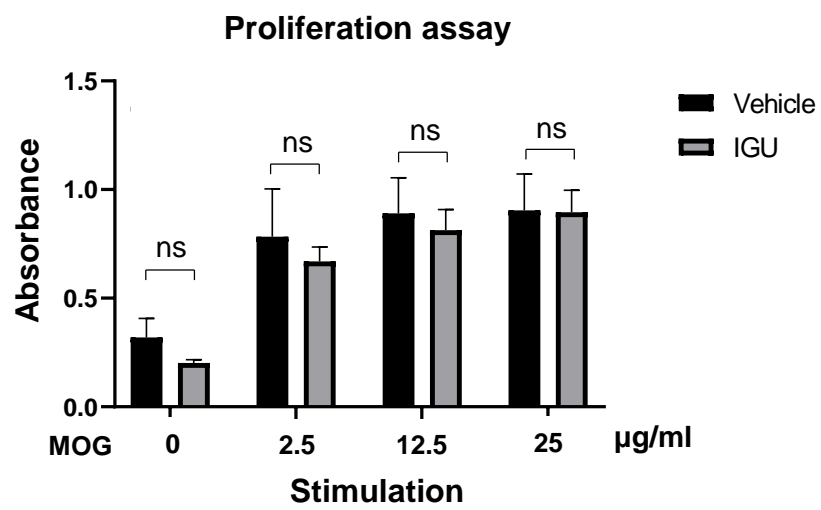

**Figure S4**

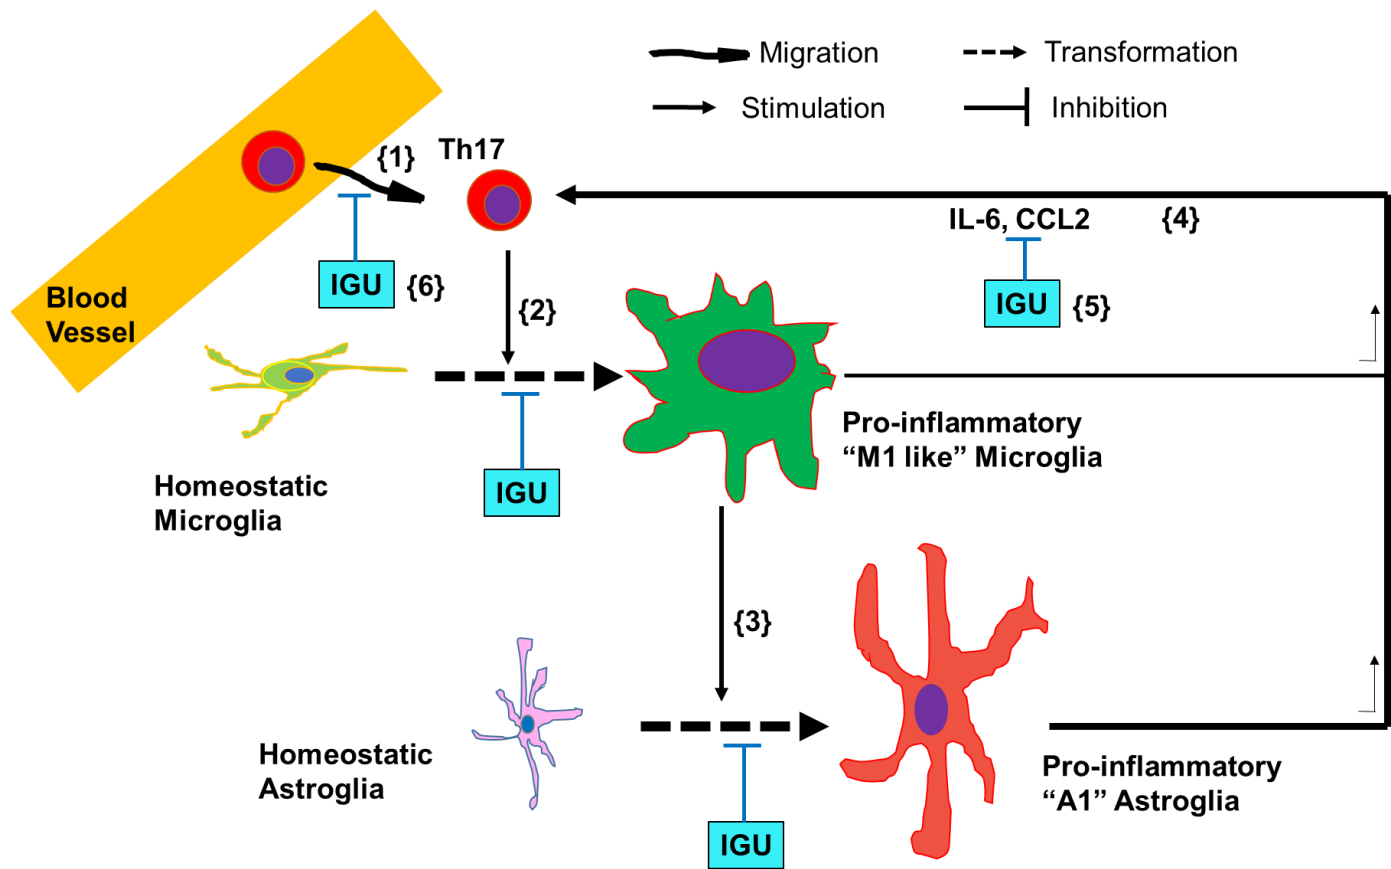

**Figure S5**

**DAB staining**

**a (all)**

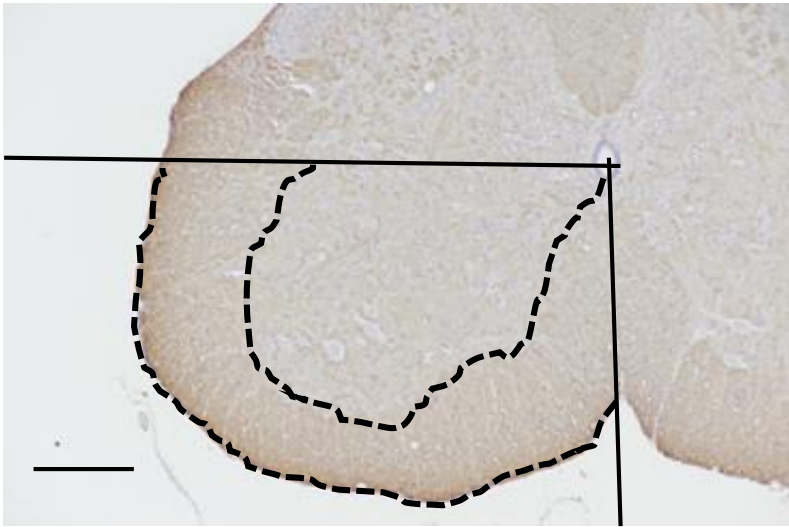

**b (Iba-1)**

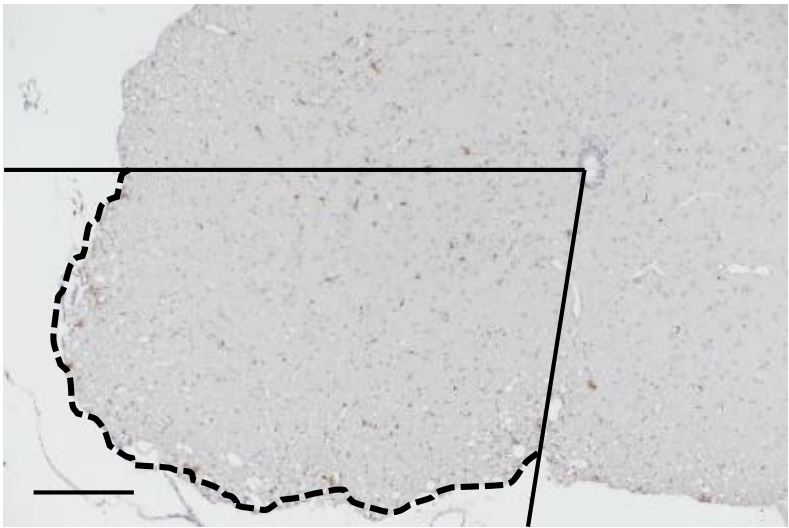

**Table S1**

| Antigen | Clone      | Host       | Dilution | Incubation temperature | Incubation time | Source         |
|---------|------------|------------|----------|------------------------|-----------------|----------------|
| MBP     | Monoclonal | Mouse      | 1:200    | 4° C                   | Overnight       | Santa Cruz     |
| CD3     | Polyclonal | Rabbit     | 1:500    | 4° C                   | Overnight       | Abcam          |
| F4/80   | C1:A3-1    | Rat        | 1:100    | 4° C                   | Overnight       | Abcam          |
| GFAP    | G-A-5      | Mouse IgG1 | 1:500    | 4° C                   | Overnight       | Sigma          |
| Iba-1   | Polyclonal | Rabbit IgG | 1:500    | 4° C                   | Overnight       | Wako           |
| C3      | 11H9       | Rat        | 1:50     | 4° C                   | Overnight       | Hycult Biotech |
| S100A10 | Monoclonal | Rabbit     | 1:50     | 4° C                   | Overnight       | Abcam          |
| iNOS    | Monoclonal | Mouse      | 1:50     | 4° C                   | Overnight       | Santa Cruz     |
| Arg-1   | 43-81      | Mouse      | 1:100    | 4° C                   | Overnight       | Santa Cruz     |
| IL-17A  | Polyclonal | Rabbit     | 1:1000   | 4° C                   | Overnight       | Abcam          |

**Table S1.** Antibodies used in this study

A common buffer was used for each antibody (5% normal goat serum + 1% bovine serum albumin in 50 mM Tris buffer).
