# Supplementary material for: Iguratimod Ameliorates the Severity of Secondary Progressive Multiple Sclerosis in Model Mice by Directly Inhibiting IL-6 Production and Th17 Cell Migration via Mitigation of Glial Inflammation
Source: Preprints.org preprint supplement (doi:10.20944/preprints202306.0987.v1), 2023-06-14
Supplement: Supplementary file 3 [file supplementary]

Archive with 4 entries (4 files):
- All supplementary contents/Supplementary figure.pdf
- All supplementary contents/Supplementary figure.pptx
- All supplementary contents/the caption of supplementary.docx
- All supplementary contents/the caption of supplementary.pdf
